# Supplementary material for: Monitoring sick leave data for early detection of influenza outbreaks
Source: Springer Nature journal article supplement (doi:10.1186/s12879-020-05754-5), 2021-01-11
Supplement: MOESM1 [file 18758206]

## Supplementary material

Figure S1: Incidence per 100,000 per week of influenza-like illness and sick leave in twelve French regions, 2010-2017. The Christmas and summer school holidays (increased worker leave periods) are shown at the bottom

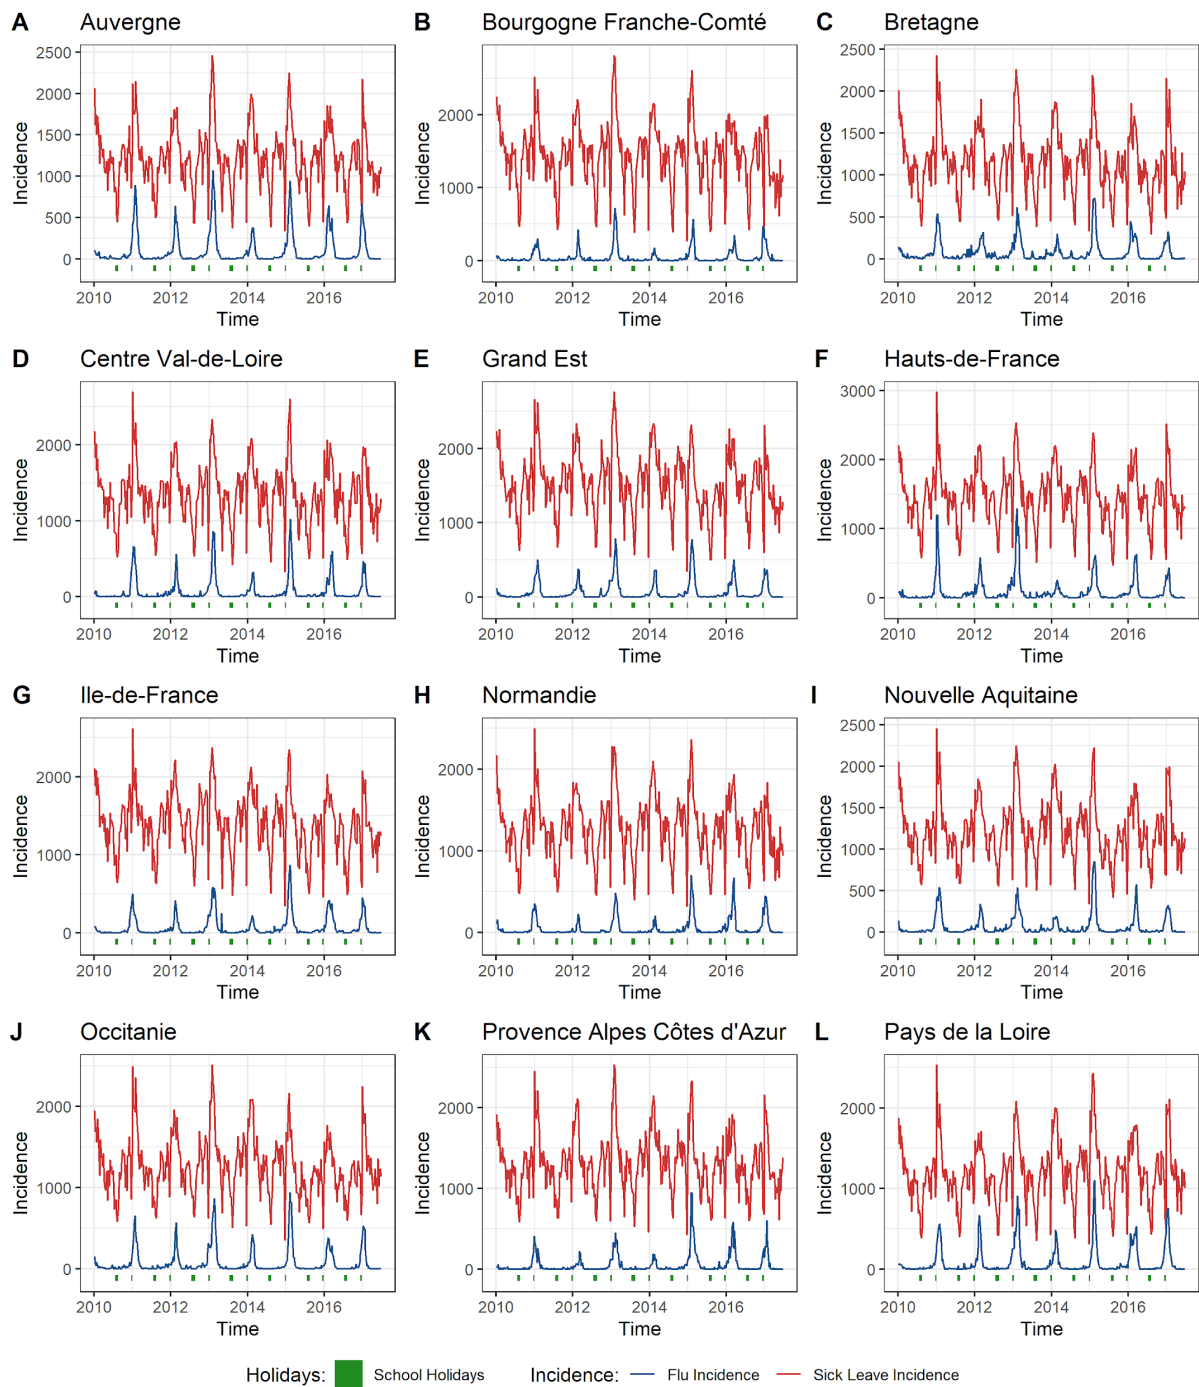

Figure S2: Incidence of influenza-like illness and sick leave, 2015-2017, and alerts from the Sentinelles and the sick-leave models, in twelve French regions. The Christmas and summer school holidays (increased worker leave periods) are shown at the bottom

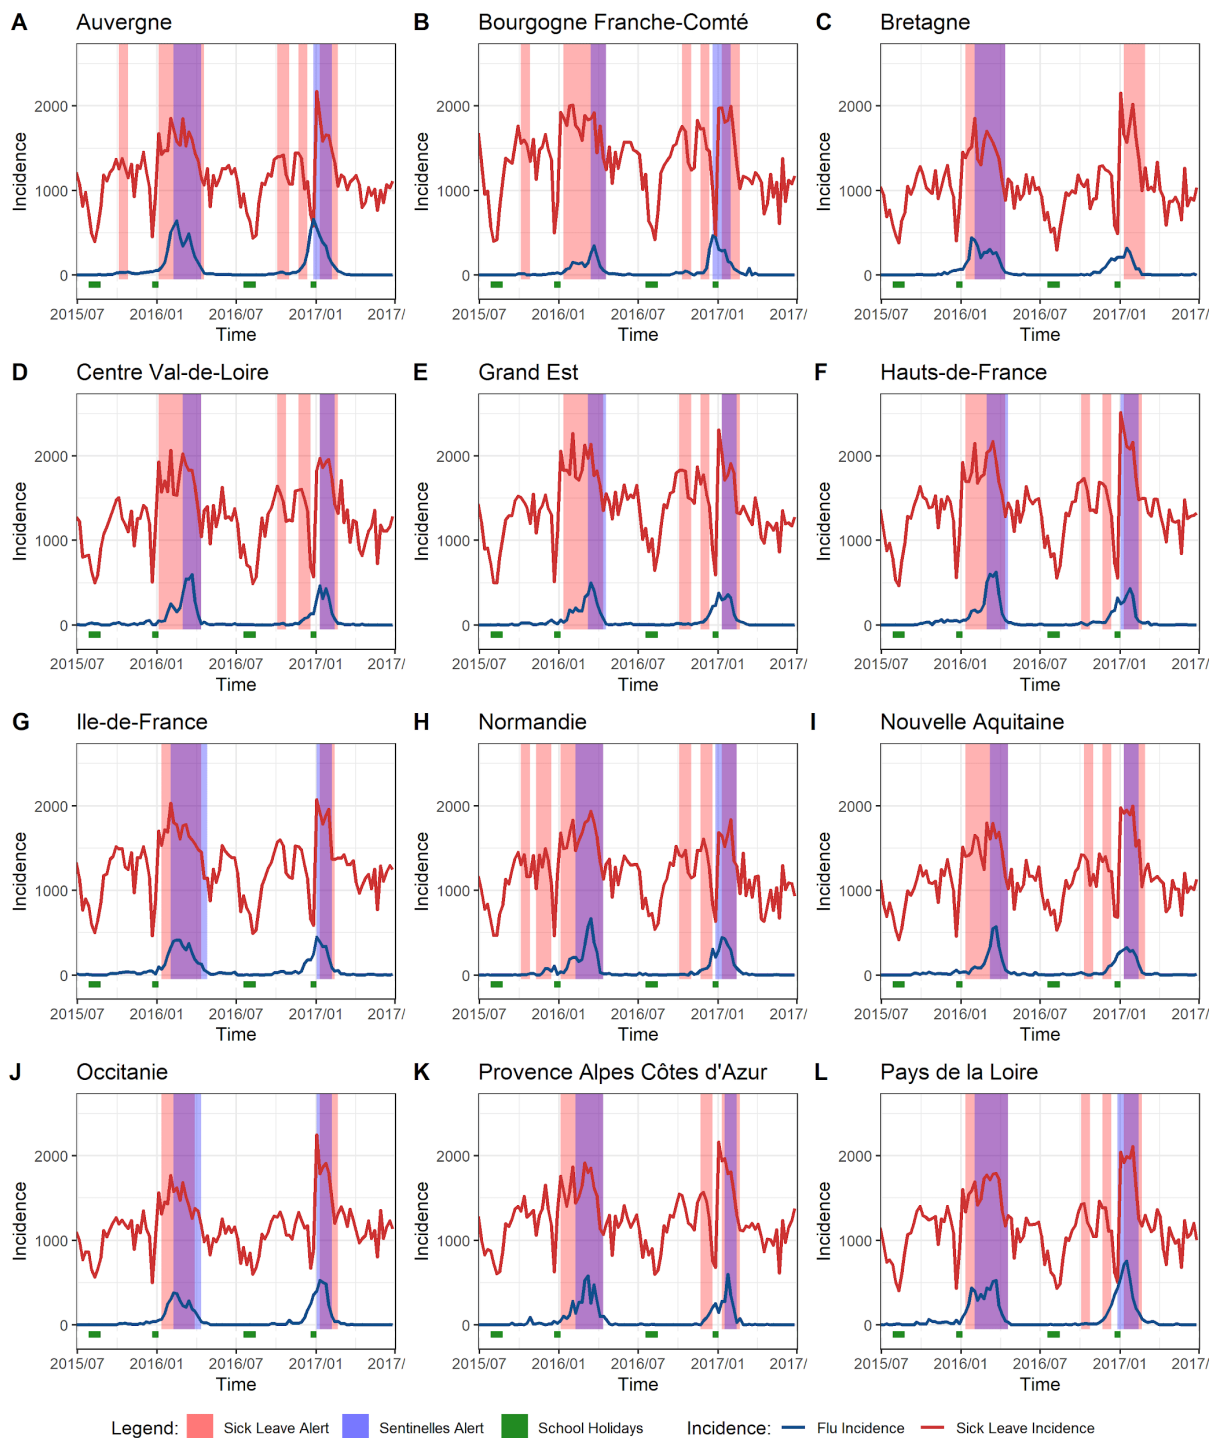

*Table S1: Performance of the sick-leave model compared to the Sentinelles model*

|                            | Sensitivity | Specificity | Youden Index | Detection time (weeks) before ILI peak |
|----------------------------|-------------|-------------|--------------|----------------------------------------|
| Auvergne-Rhone-Alpes       | 0.87        | 0.81        | 0.68         | 1.5                                    |
| Bourgogne-Franche-Comte    | 0.64        | 0.80        | 0.44         | 3                                      |
| Bretagne                   | 1           | 0.89        | 0.89         | 3                                      |
| Centre-Val de Loire        | 1           | 0.83        | 0.83         | 4                                      |
| Grand Est                  | 0.91        | 0.84        | 0.75         | 4                                      |
| Hauts-de-France            | 0.83        | 0.84        | 0.67         | 3                                      |
| Ile-de-France              | 0.82        | 0.95        | 0.77         | 1                                      |
| Normandie                  | 0.93        | 0.80        | 0.73         | 1.5                                    |
| Nouvelle-Aquitaine         | 1           | 0.85        | 0.85         | 4                                      |
| Occitanie                  | 0.79        | 0.95        | 0.74         | 1.5                                    |
| Pays de la Loire           | 0.89        | 0.87        | 0.76         | 0.5                                    |
| Provence-Alpes-Cote-d'Azur | 1           | 0.87        | 0.87         | 3                                      |
| Total mean                 | 0.89        | 0.86        | 0.75         | 2.5                                    |

For each region, the values of these indicators are averaged over the two years evaluated.
